# Supplementary material
Source: publisher figshare collection journal article supplement (https://tandf.figshare.com/ndownloader/files/12296963)
Supplement: Supplementary file 1 [file 12296963]

**Supplementary table 1.** Baseline characteristics of PCNSL patients separated by chemotherapy response

| Prognostic factors | CR (N=16)  (%) | PR (N=6)  (%) | SD/PD (N=8)  (%) | Toxicity (N=7) (%) |
| --- | --- | --- | --- | --- |
| Age (yr)  ECOG 2 – 4  Elevated LDH  Deep structurea  High CSF protein  Missing CSF data  HD-MTX | 56.5 (36 – 69)  6/16 (37.5)  5/16 (31.3)  7/16 (43.8)  7/11  5  6/16 (37.5) | 54 (42 – 56)  2/5 (40)  1/5 (20)  2/6 (33.3)  3/4  2  2/6 (33.3) | 54.5 (29 – 67)  3/7 (42.9)  2/6 (33.3)  5/8 (62.5)  2/2  6  5/8 (62.5) | 63 (16 – 78)  6/7 (85.7)  1/5 (20)  4/7 (57.1)  2/5  2  3/7 (42.9) |

a deep structure: brain stem, cerebellum, basal ganglion, periventricular and corpus callosum

CR; complete response, PR; partial response, SD; stable disease, PD; progressive disease, ECOG; Eastern Cooperative Oncology Group, LDH; lactate dehydrogenase, CSF; cerebrospinal fluid
